# Supplementary material
Source: PubMed Central journal article supplement (PMC11639248)
Supplement: NIHPP2024.05.27.596106v2-supplement-1.pdf [file NIHPP2024.05.27.596106v2-supplement-1.pdf]

## SUPPLEMENTAL FIGURE 1

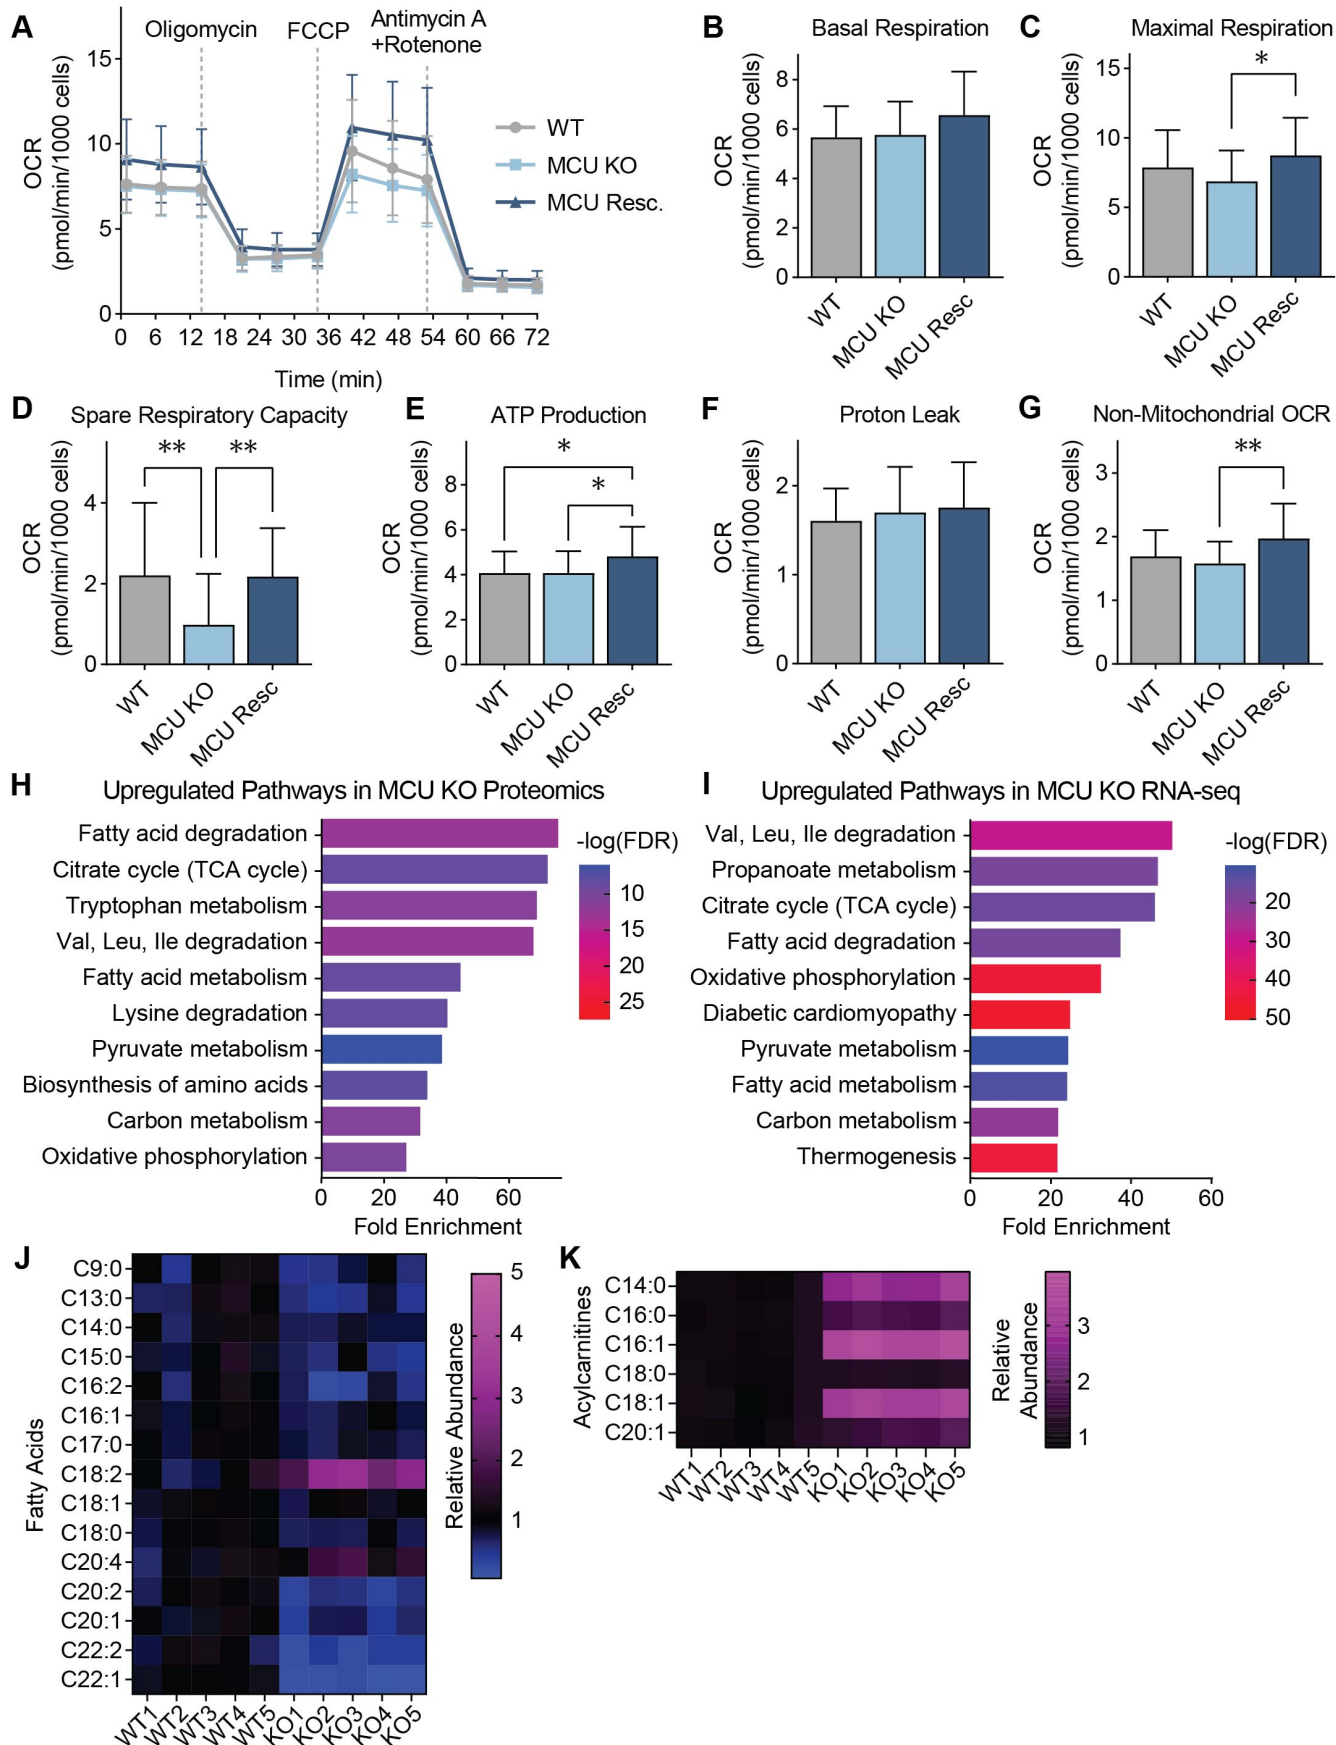

## Supplemental Figure 1

**(A-G)** Seahorse extracellular flux analysis in WT, MCU KO, and MCU rescue HeLa cells. Oxygen consumption rates at baseline and after indicated treatments are shown in (A); indicated mitochondrial parameters are shown in (B-G). Statistical significance was determined by the Tukey-Kramer test following one-way ANOVA; n=24-28. **(H, I)** Gene Set Enrichment Analysis of mitochondrial proteins (H) or mRNAs coding for mitochondrial proteins (I) that show a statistically significant increase in MCU KO cells compared to WT cells. **(J, K)** Relative abundance of fatty acids (J) and acylcarnitines (K) in WT and MCU KO HeLa cells; loss of MCU decreases steady state levels of very long chain fatty acids, but increases acylcarnitines, suggesting activation of the mitochondrial FAO pathway. All error bars indicate standard deviation; \* indicates a p-value < 0.05 and \*\* indicates a p-value < 0.01.

## SUPPLEMENTAL FIGURE 2

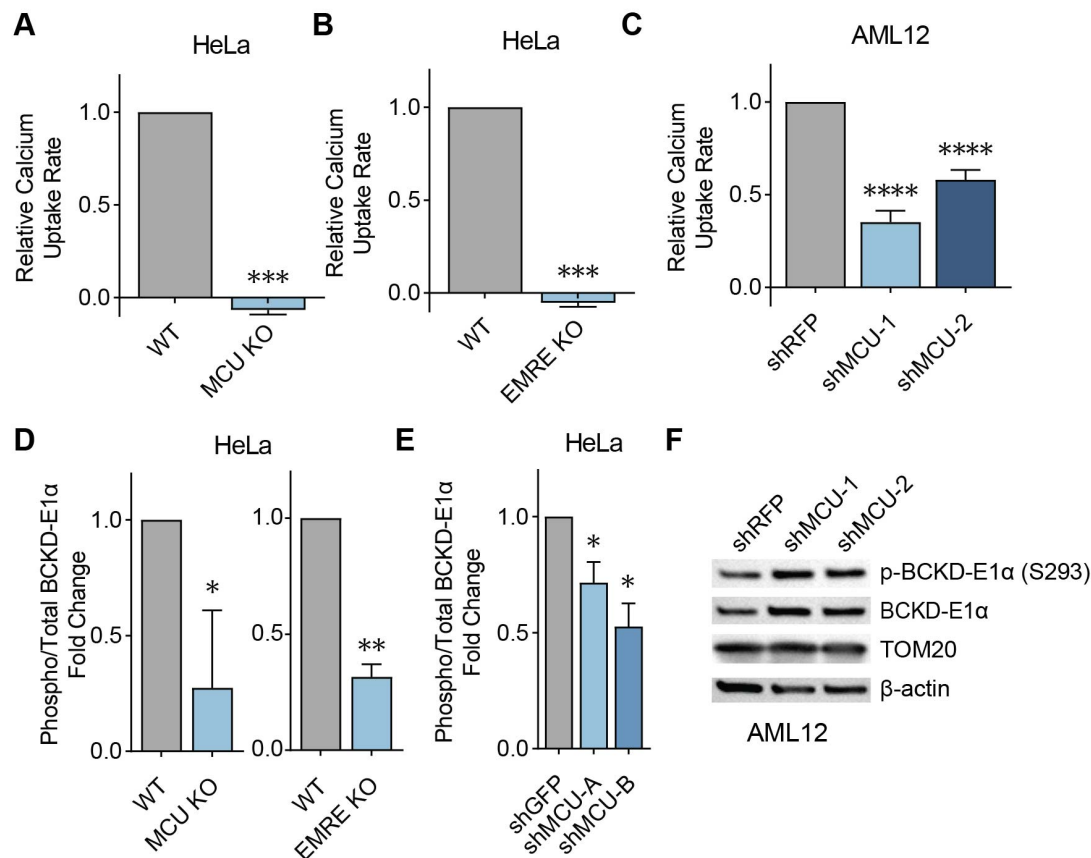

### Supplemental Figure 2

(A,B) Mitochondrial Ca<sup>2+</sup> uptake rates in MCU KO (A) and EMRE KO (B) cells relative to WT controls are shown; n=3. (C) Mitochondrial Ca<sup>2+</sup> uptake rates following MCU knockdown compared to control RFP knockdown in AML12 cells; n=8. (D) Quantification of immunoblots in Fig. 2E shown as the relative abundance of phosphorylated BCKD-E1α to total BCKD-E1α; n=3. (E) Quantification of immunoblots in Fig. 2F shown as the relative abundance of phosphorylated BCKD-E1α to total BCKD-E1α; n=3. (F) Immunoblots of phosphorylated and total BCKD-E1α in AML12 cells with or without MCU knockdown. All error bars indicate standard deviation; \* indicates a p-value < 0.05, \*\* indicates a p-value < 0.01, \*\*\* indicates a p-value < 0.001, and \*\*\*\* indicates a p-value < 0.0001.

### SUPPLEMENTAL FIGURE 3

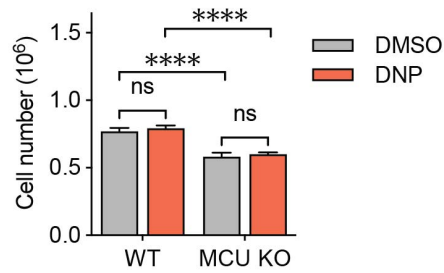

### Supplemental Figure 3

Cell numbers of WT and MCU KO cells with and without 2 M  $\mu$ DNP. Cells were counted three days after plating and treatment; n=3. Statistical significance was determined by Dunnett's multiple comparisons test following one-way ANOVA

## SUPPLEMENTAL FIGURE 4

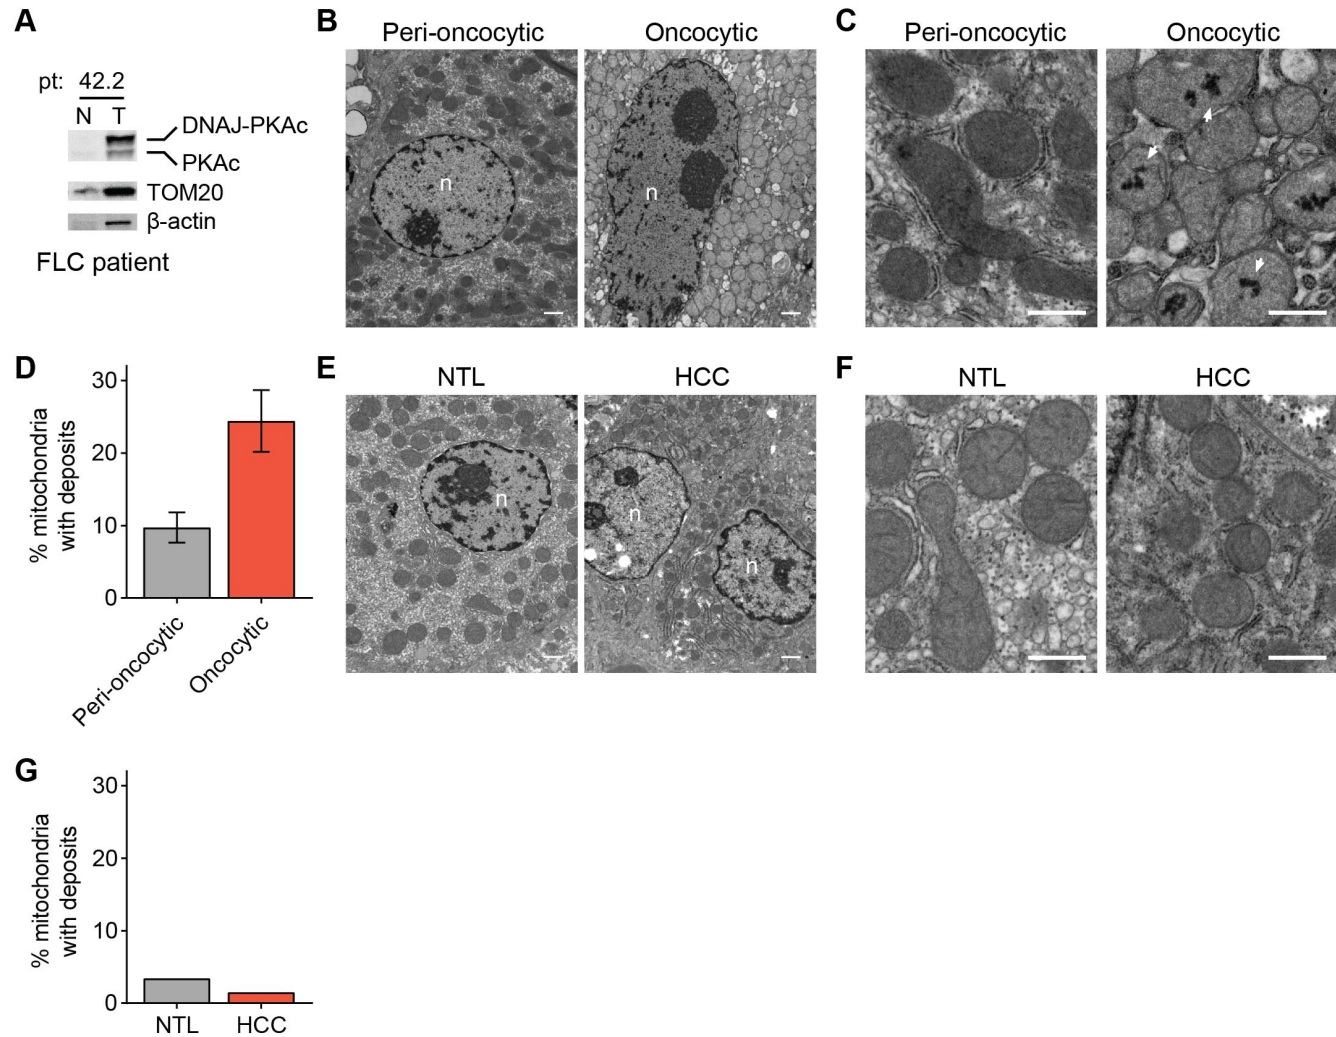

### Supplemental Figure 4

**(A)** Immunoblot of tumor (T) and non-tumor liver (N) samples from FLC patient 42.2 showing fusion protein expression. **(B)** Electron micrographs at 10,000x magnification of oncocyctic liver cells and proximal (peri-oncocyctic) cells from the tumor periphery of FLC Patient 42.2; normal tumor sample was not dissected in this surgery; scale bar = 1  $\mu$ m; nuclei are labeled n. **(C)** Electron micrographs of samples shown in (B) at 25,000x magnification; white arrowheads mark representative  $\text{Ca}^{2+}$  deposits in the oncocyctic cells; scale bar = 600 nm. **(D)** Percentage of mitochondria with  $\text{Ca}^{2+}$  deposits in EM samples shown in (C); the mean is reported from manual counting of >500 mitochondria per sample by two independent, blinded analysts; error bars indicate standard deviation. **(E)** Electron micrographs at 10,000x magnification of non-tumor (NTL) and tumor (HCC) sections from HCC patient 7; scale bar = 1  $\mu$ m; nuclei are labeled n. **(F)** Electron micrographs of samples shown in (E) at 25,000x magnification; scale bar = 600 nm. **(G)** Percentage of mitochondria with  $\text{Ca}^{2+}$  deposits in EM samples shown in (F); >100 mitochondria per sample were quantified by an independent, blinded analyst.

## SUPPLEMENTAL FIGURE 5

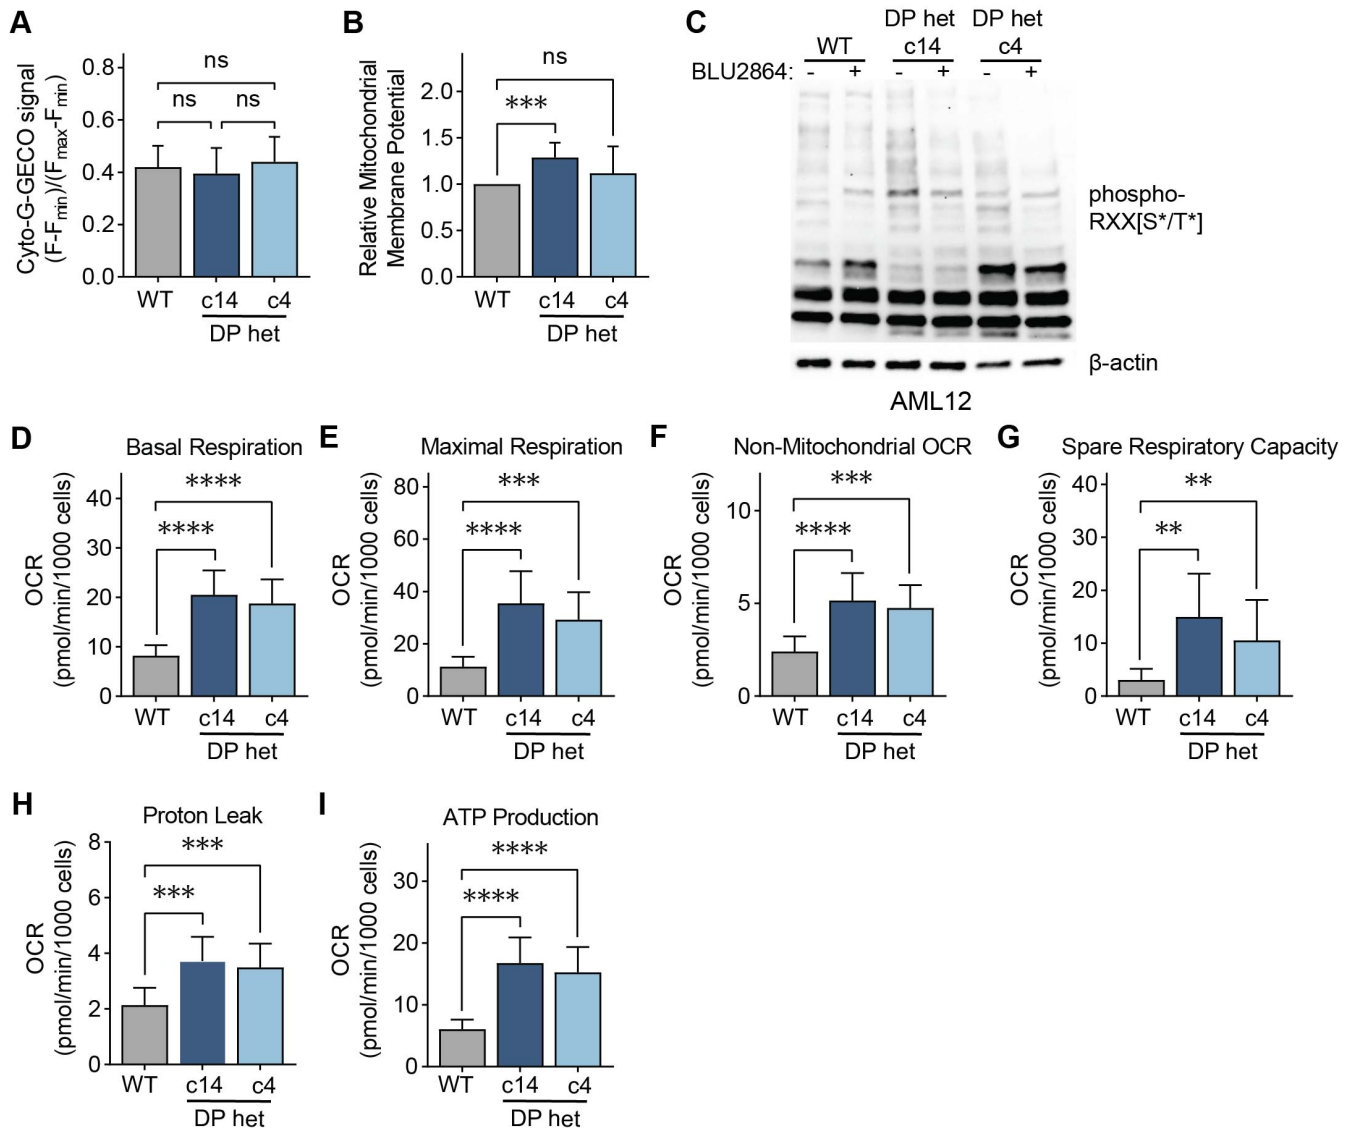

### Supplemental Figure 5

**(A)** Baseline cyto-G-GECO fluorescence normalized to minimum and maximum signals in AML12 WT, c14, and c4 cells; statistical significance was determined by one-way ANOVA; n=11-12. **(B)** Resting mitochondrial membrane potential was measured by the difference in TMRM fluorescence before and after CCCP addition, normalized to WT AML12 cells. **(C)** Immunoblot of AML12 lysates with a phospho-PKA substrate motif antibody after 5  $\mu$ M BLU2864 or DMSO treatment for 4 days. **(D-I)** Indicated mitochondrial parameters of AML12 cells from Seahorse extracellular flux analysis shown in Fig. 5I; statistical significance was determined by the Dunnett test following Welch's one-way ANOVA; n=10-16. All error bars indicate standard deviation; ns indicates non-significant, \*\* indicates a p-value < 0.01, \*\*\* indicates a p-value < 0.001, and \*\*\*\* indicates a p-value < 0.0001.

## SUPPLEMENTAL FIGURE 6

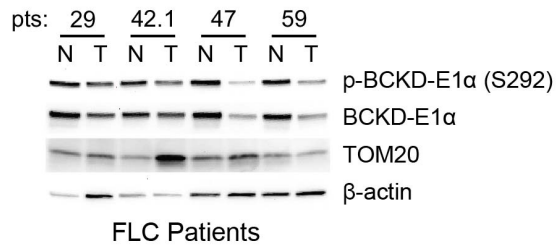

### Supplemental Figure 6

Immunoblots of phosphorylated and total BCKD-E1 $\alpha$  in non-tumor (N) and tumor (T) lysates from FLC patients.

### Supplemental Table 1. Patient Information

| Patient ID | Diagnosis                                | Age | Sex    |
|------------|------------------------------------------|-----|--------|
| 7          | Hepatocellular carcinoma; history of HCV | 70  | Female |
| 9          | Fibrolamellar carcinoma                  | 27  | Male   |
| 17         | Fibrolamellar carcinoma                  | 14  | Female |
| 29         | Fibrolamellar carcinoma                  | 20  | Male   |
| 42.1*      | Fibrolamellar carcinoma                  | 26  | Male   |
| 42.2*      | Fibrolamellar carcinoma                  | 27  | Male   |
| 47         | Fibrolamellar carcinoma                  | 26  | Male   |
| 58         | Fibrolamellar carcinoma                  | 18  | Female |
| 59         | Fibrolamellar carcinoma                  | 18  | Female |

\*Patient 42.1 and 42.2 refer to the same individual; the latter resection was performed following tumor recurrence.
